# Supplementary material
Source: PubMed Central journal article supplement (PMC3772962)
Supplement: NIHMS496335-supplement-Supporting_Information_01.pdf [file NIHMS496335-supplement-Supporting_Information_01.pdf]

**Supplemental Information 01.** Dynamics of age-related pathological parameters during lifespan.

| Tissue | Parameter                                                               |                                                                                       |
|--------|-------------------------------------------------------------------------|---------------------------------------------------------------------------------------|
| Liver  | Focal lymphoid proliferation                                            |    |
|        | Scattered extramedullary hematopoiesis (Scat. extramed. hematopo.)      |    |
|        | Karyomegaly                                                             |    |
|        | Intranuclear droplets                                                   |    |
|        | Hepatocellular vacuolization                                            |    |
|        | Ito cell vacuolization                                                  |    |
|        | Lipofuscin index                                                        |   |
| Kidney | Karyomegaly                                                             |  |
|        | Lymphoid proliferation                                                  |  |
|        | Glomerular membrane thickening (Glom. membrane thickening)              |  |
|        | Tubular degeneration                                                    |  |
| Spleen | Lymphocytolysis                                                         |  |
|        | Iron laden macrophages                                                  |  |
| Lung   | Peribronchiolar lymphoid proliferation (Peribronch. lymphoid prolifer.) |  |
| Brain  | Vacuolization white matter                                              |  |
|        | Lipofuscinosis neurons                                                  |  |
|        | Periventricular GFAP                                                    |  |
|        | Hippocampus GFAP                                                        |  |
