# Supplementary material
Source: PubMed Central journal article supplement (PMC3772962)
Supplement: NIHMS496335-supplement-Supporting_Information_03-12.pdf [file NIHMS496335-supplement-Supporting_Information_03-12.pdf]

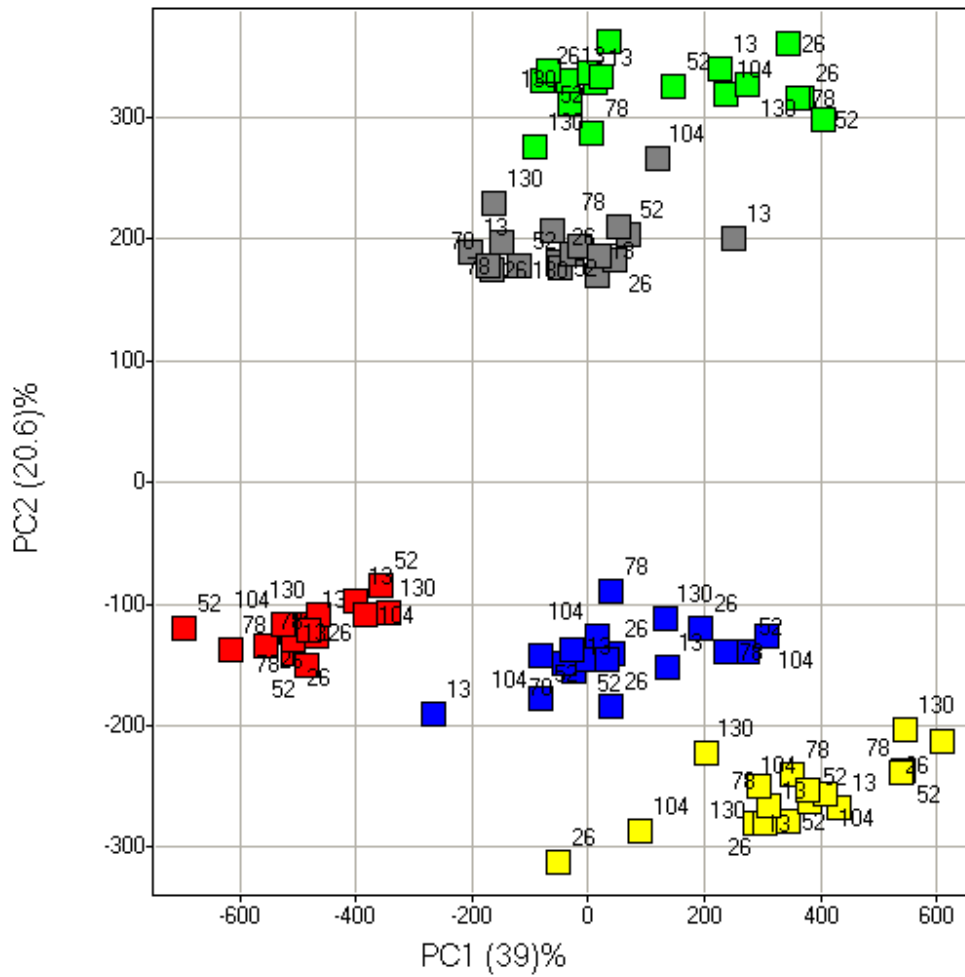

**Supplemental information 03.**

Scatter plot depicting the samples plotted against the first two principal components calculated from the intensities of the perfect match probes. The colors indicate liver (yellow), kidney (blue), spleen (green), lung (grey), brain (red). The numbers indicate the age of each sample (in weeks.)

**Supplemental Information 04.** List of genes that were differentially expressed (FDR corrected p-values and q-values (FDR adjusted p-values) are listed, indicating the degree of significance. A: DEGs are ordered based on q-value, and q-values < 0.050 are marked green. The visible overlap is shown in green. B: Expression profiles during aging in all organs of the only gene that is significantly differentially expressed.

l value  $\leq 0.05$ ) in any of the organs  
nce of differential expression of all DEGs during aging.  
nmarized in SI06.  
ssed in all five organs examined: Lilrb4 (Affymetrix probe-set identifier 1420394\_s\_at)

**Supplemental information 05.** Dynamics of several literature based age-related genes during murine lifespan. Liver (red), kidney (blue), spleen (black), lung (yellow) and brain (green).

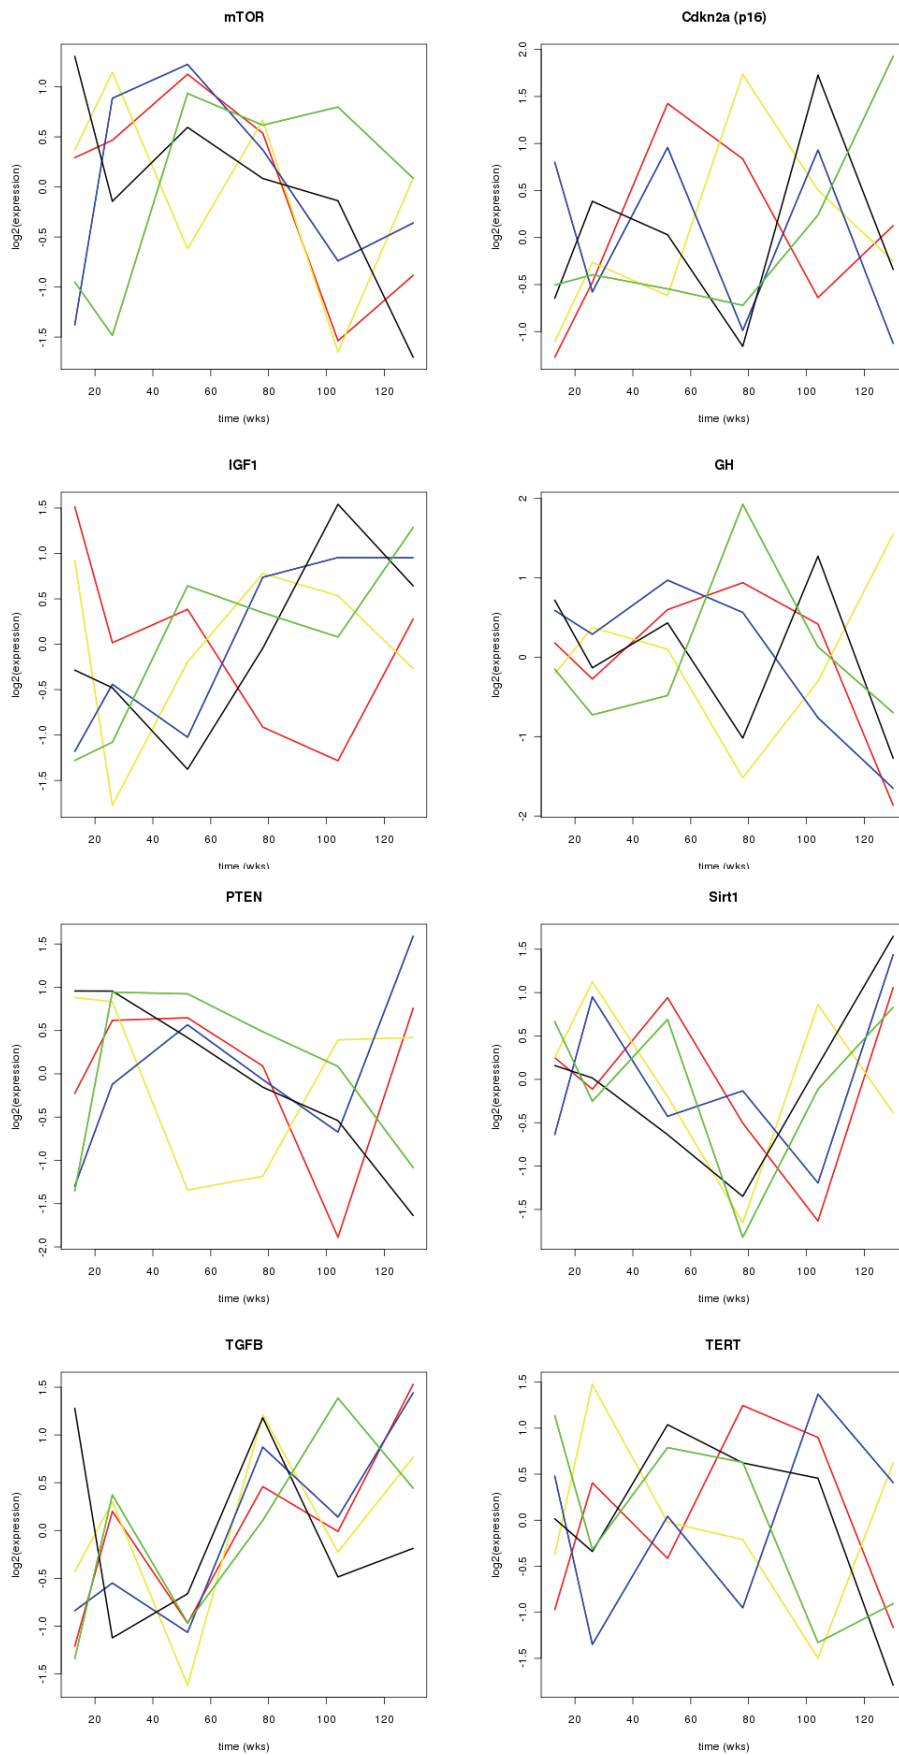

**Supplemental Information 06.** The organ intersections in differentially expressed genes (DEGs) (SI04) and functionally related altered gene sets (AGSs) (SI07).

|                | <b>Organ</b>                       | <b>DEGs</b>  | <b>AGSs</b> |
|----------------|------------------------------------|--------------|-------------|
|                | liver                              | 6,973        | 122         |
|                | kidney                             | 2,325        | 203         |
|                | spleen                             | 925          | 307         |
|                | lung                               | 1,025        | 59          |
|                | brain                              | 15           | 82          |
| <b>Overlap</b> | <b>Organ combinations</b>          | <b>DEGs</b>  | <b>AGSs</b> |
| Specific       | liver                              | 5,886        | 63          |
|                | kidney                             | 1,533        | 118         |
|                | spleen                             | 588          | 164         |
|                | lung                               | 679          | 16          |
|                | brain                              | 5            | 20          |
|                | <i>subtotal</i>                    | <i>8,691</i> | <i>381</i>  |
| Two            | liver; kidney                      | 594          | 8           |
|                | liver; spleen                      | 219          | 14          |
|                | liver; lung                        | 177          | 5           |
|                | liver; brain                       | 3            | 0           |
|                | kidney; spleen                     | 40           | 10          |
|                | kidney; lung                       | 76           | 3           |
|                | kidney; brain                      | 0            | 8           |
|                | spleen; lung                       | 25           | 3           |
|                | spleen; brain                      | 0            | 11          |
| lung; brain    | 0                                  | 13           |             |
|                | <i>subtotal</i>                    | <i>1,134</i> | <i>75</i>   |
| Three          | liver; kidney; spleen              | 24           | 1           |
|                | liver; kidney; lung                | 41           | 0           |
|                | liver; kidney; brain               | 3            | 0           |
|                | liver; spleen; lung                | 12           | 1           |
|                | liver; spleen; brain               | 2            | 0           |
|                | liver; lung; brain                 | 0            | 0           |
|                | kidney; spleen; lung               | 3            | 5           |
|                | kidney; spleen; brain              | 0            | 10          |
|                | kidney; lung; brain                | 0            | 3           |
|                | spleen; lung; brain                | 0            | 0           |
|                | <i>subtotal</i>                    | <i>85</i>    | <i>20</i>   |
| Four           | liver; kidney; spleen; lung        | 10           | 0           |
|                | liver; kidney; spleen; brain       | 0            | 0           |
|                | liver; spleen; lung; brain         | 1            | 0           |
|                | liver; kidney; lung; brain         | 0            | 2           |
|                | kidney; spleen; lung; brain        | 0            | 4           |
|                | <i>subtotal</i>                    | <i>11</i>    | <i>6</i>    |
| Generic        | liver; kidney; spleen; lung; brain | 1            | 0           |
|                | <i>subtotal</i>                    | <i>1</i>     | <i>0</i>    |
|                | <i>total</i>                       | <i>9,922</i> | <i>482</i>  |

**Supplemental Information 07.** Lists of altered gene sets (AGSs) that were found to be involved

#####

in aging in the different organs after gene set analysis (GSA) overrepresentation analysis (ORA)

#####

and Metacore overrepresentation analysis (M-ORA).

#####



**Supplemental information 08.** Dynamics of average, age-related gene expression changes of selected organ-specific, overrepresented gene sets.

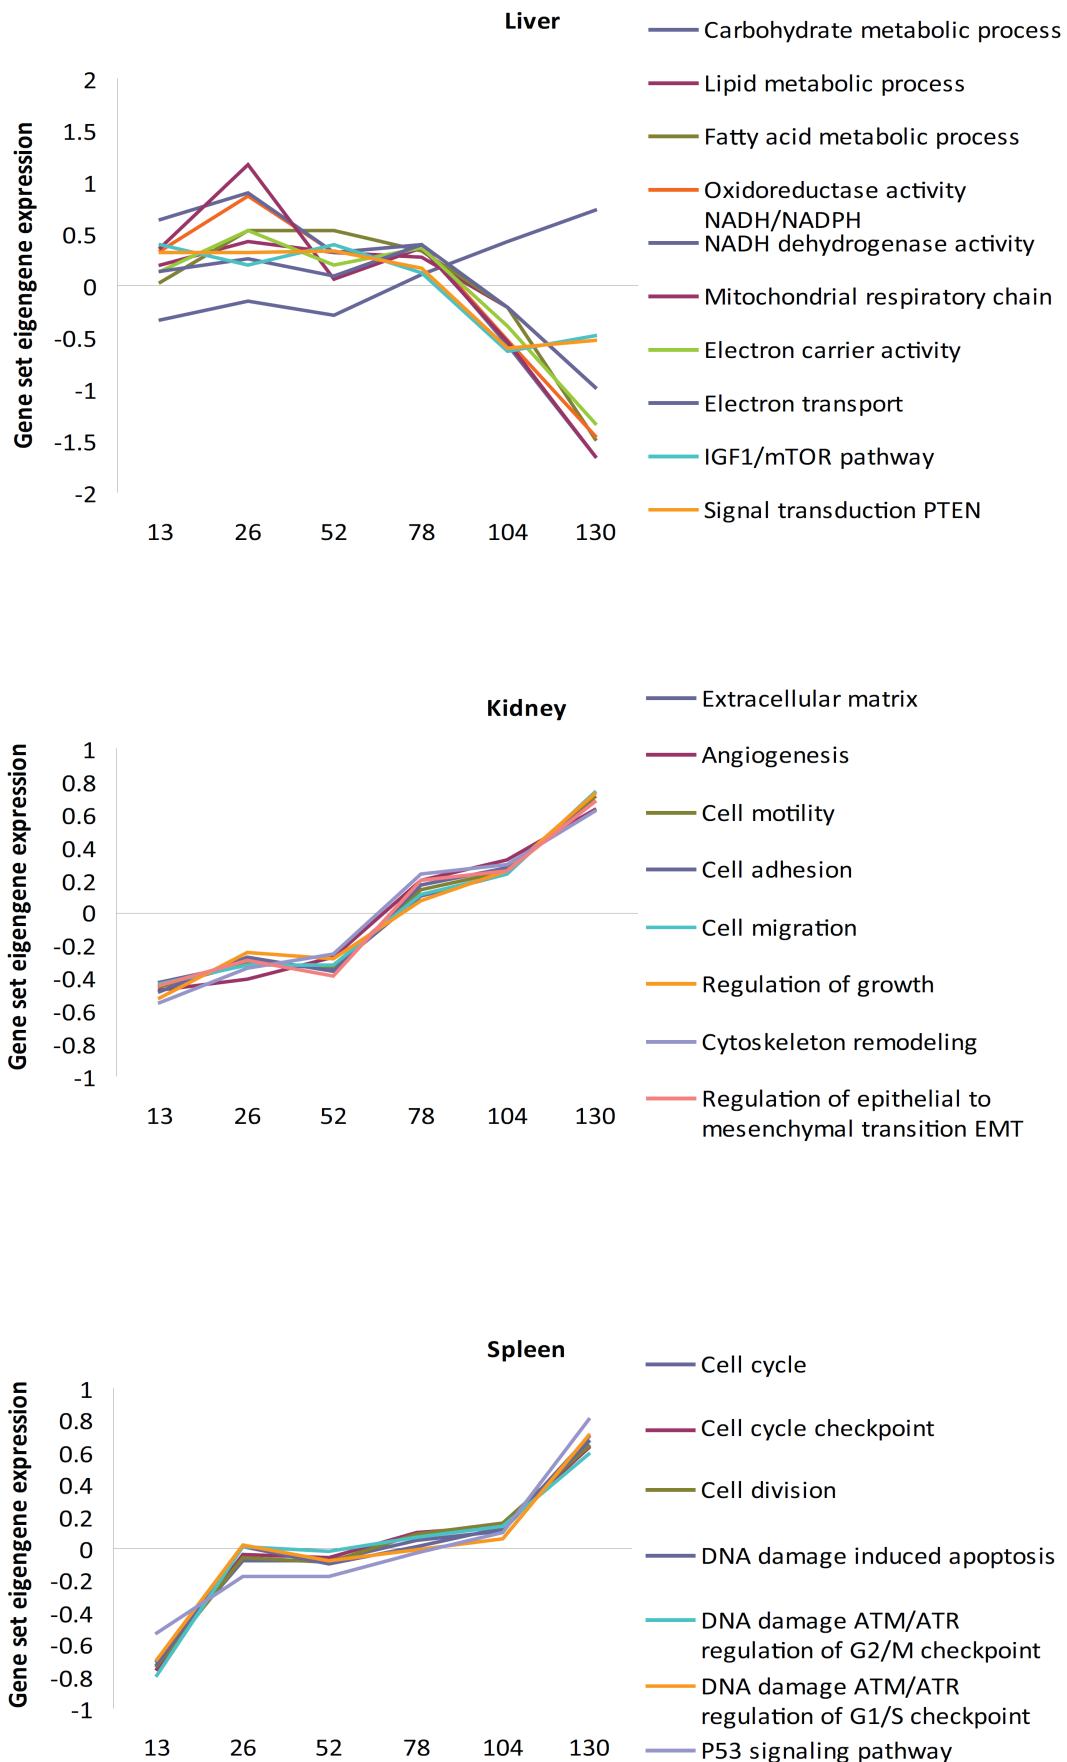

**Supplemental information 09.** Organ-specific gene expression dynamics of common immune related gene sets in kidney, spleen, and lung.

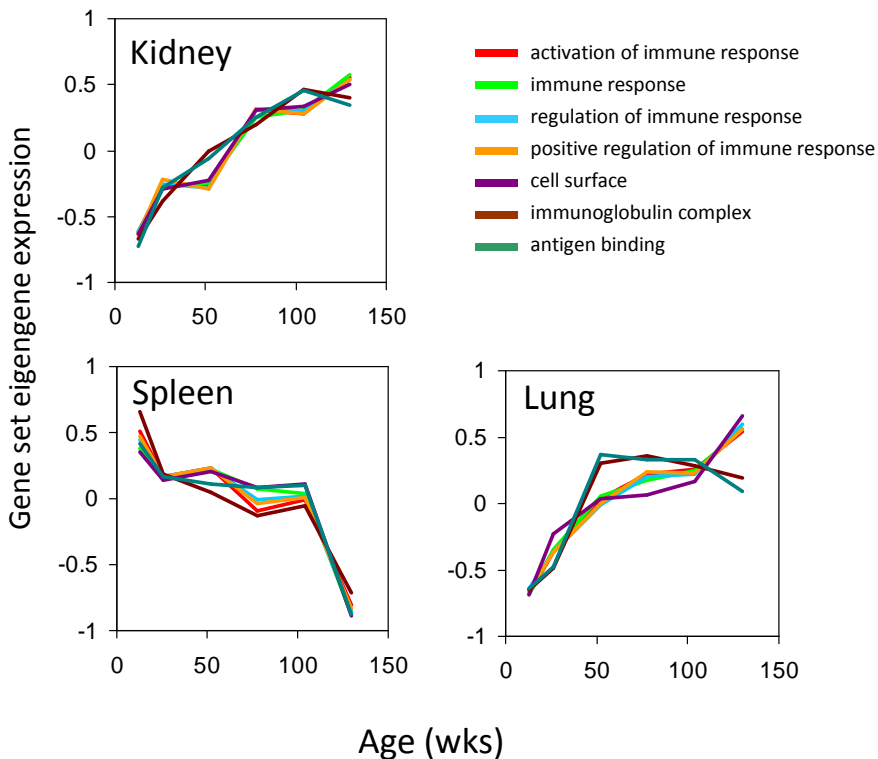

**Supplemental Information 10.** List of genes that showed significant correlation (p-value  $\leq 0.001$ ) with  
The p-values of the correlation (cor) and partial correlation, which includes a correction for chronology  
The union of the correlated and partial correlated genes per pathological parameter are presented in Table 1

th any pathological parameter in any of the organs.  
ical age, (pcor) are shown.

**Supplemental Information 11.** Lists of altered gene sets (AGSs) correlated to the pathological  
1= Found as an AGS (green). Grey cells indicate processes also present as an AGS in chronolog

parameters in five organs after gene set analysis (GSA), overrepresentation analysis (ORA) and  
gical ginga

l Metacore overrepresentation analysis (M-ORA). If present, overlap with chronologi

**Supplemental information 12.** Predefined list of aging related gene-sets based on literature.

| Source        | Gene set                                         | # genes |
|---------------|--------------------------------------------------|---------|
| Gene Ontology | aging_GO:0007568                                 | 24      |
| Gene Ontology | cell aging_GO:0007569                            | 10      |
| Gene Ontology | multicellular organismal aging_GO:0010259        | 7       |
| Gene Ontology | response to reactive oxygen species_GO:0000302   | 16      |
| Gene Ontology | response to hydrogen peroxide_GO:0042542         | 10      |
| Gene Ontology | response to oxygen radical_GO:0000305            | 5       |
| Gene Ontology | DNA repair_GO:0006281                            | 177     |
| Gene Ontology | base-excision repair_GO:0006284                  | 16      |
| Gene Ontology | double-strand break repair_GO:0006302            | 18      |
| Gene Ontology | mismatch repair_GO:0006298                       | 9       |
| Gene Ontology | non-recombinational repair_GO:0000726            | 6       |
| Gene Ontology | nucleotide-excision repair_GO:0006289            | 22      |
| Gene Ontology | recombinational repair_GO:0000725                | 6       |
| Gene Ontology | telomere maintenance_GO:0000723                  | 17      |
| Gene Ontology | response to oxidative stress_GO:0006979          | 45      |
| Joost         | Energy_restriction_and_the_GH.IGF.1_axis         | 13      |
| Joost         | DNA_metabolism                                   | 30      |
| Joost         | Oxidant_levels_and_redox_potential               | 18      |
| Joost         | Stress_response                                  | 5       |
| BIOCARTA      | ARENRF2_PATHWAY                                  | 14      |
| BIOCARTA      | INFLAM_PATHWAY                                   | 26      |
| BIOCARTA      | DEATH_PATHWAY                                    | 30      |
| BIOCARTA      | LONGEVITY_PATHWAY                                | 15      |
| BIOCARTA      | STRESS_PATHWAY                                   | 25      |
| BIOCARTA      | WNT_PATHWAY                                      | 25      |
| BIOCARTA      | P53_PATHWAY                                      | 16      |
| BIOCARTA      | NFKB_PATHWAY                                     | 22      |
| BIOCARTA      | IGF1MTOR_PATHWAY                                 | 19      |
| BIOCARTA      | IGF1_PATHWAY                                     | 22      |
| BIOCARTA      | MTOR_PATHWAY                                     | 23      |
| KEGG          | OXIDATIVE_PHOSPHORYLATION                        | 110     |
| KEGG          | MTOR_SIGNALING_PATHWAY                           | 52      |
| KEGG          | BASE_EXCISION_REPAIR                             | 30      |
| KEGG          | NUCLEOTIDE_EXCISION_REPAIR                       | 43      |
| KEGG          | MISMATCH_REPAIR                                  | 22      |
| KEGG          | WNT_SIGNALING_PATHWAY                            | 148     |
| REACTOME      | BASE_EXCISION_REPAIR                             | 16      |
| REACTOME      | CELL_DEATH_SIGNALLING_VIA_NRAGE_NRIF_AND_NADE    | 54      |
| REACTOME      | DEATH_RECEPTOR_SIGNALLING                        | 11      |
| REACTOME      | DNA_REPAIR                                       | 82      |
| REACTOME      | DOUBLE_STRAND_BREAK_REPAIR                       | 19      |
| REACTOME      | EXTENSION_OF_TELOMERES                           | 23      |
| REACTOME      | SIGNALING_BY_WNT                                 | 16      |
| REACTOME      | SYNTHESIS_OF_DNA                                 | 46      |
| REACTOME      | TELOMERE_MAINTENANCE_hs                          | 37      |
| REACTOME      | APOPTOSIS                                        | 82      |
| REACTOME      | ENERGY_DEPENDENT_REGULATION_OF_MTOR_BY_LKB1_AMPK | 12      |
| REACTOME      | MTOR_SIGNALLING                                  | 22      |
| REACTOME      | MTORC1_MEDIATED_SIGNALLING                       | 10      |
